# Supplementary material
Source: Springer Nature journal article supplement (https://www.springermedizin.de/resource/supplementary/12902_2014_312_MOESM7_ESM.pdf/9515938)

**Male**

—■— control vehicle  
 - - -▲- - - diabetes vehicle

- - -▲- - - diabetes vehicle  
 - - ■ - - diabetes vitamin

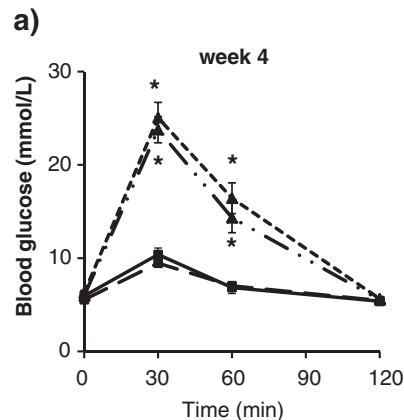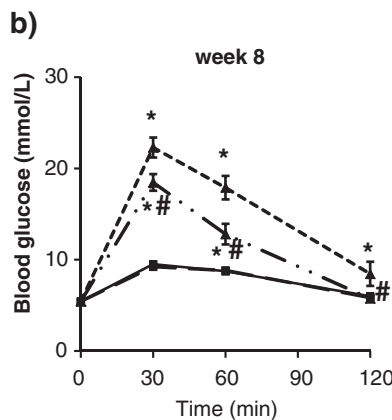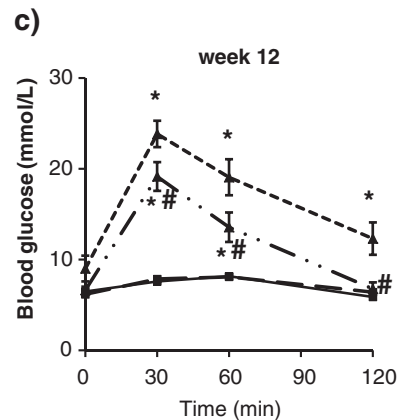**Female**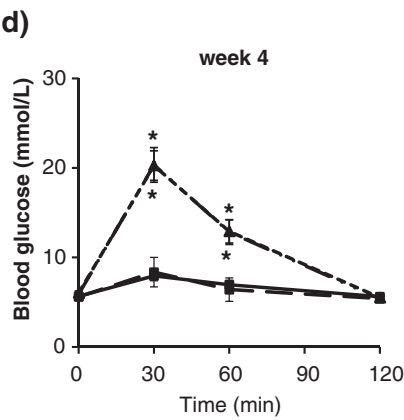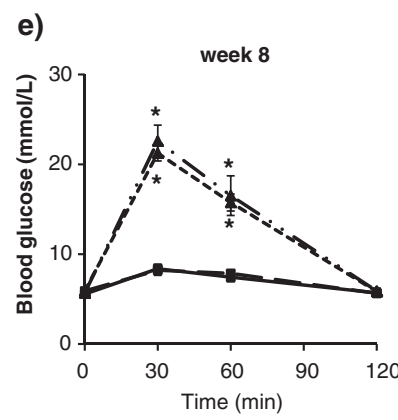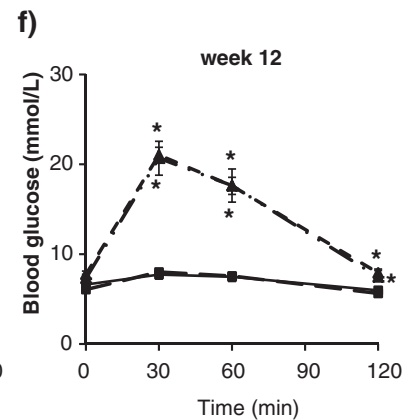

Supplement: MOESM7 [file 9515938]
